# Supplementary material for: A New Ilarvirus Found in French Hydrangea
Source: MDPI journal article supplement (doi:10.3390/plants11070944), 2022-03-30
Supplement: s1 [file s1]

**Table S1.** Primers used to complete the genome sequencing or for the detection of hydrangea vein banding virus (HdVBV) from symptomatic *Hydrangea macrophylla*.

| Primer                     | sequence 5'-3'                                                            | Reference                             |
|----------------------------|---------------------------------------------------------------------------|---------------------------------------|
| RNA1                       |                                                                           |                                       |
| Ilar2F5<br>Ilar2R9         | TCRAYRTTYGAYAARTCNCA<br>GGTTGRTRTRTGHGGRAAYTT                             | Untiveros et al. <a href="#">2010</a> |
| HVR1Af<br>HVR1Br           | GTATTGTGCAGTATTATTTTAC<br>CTCCWATATCRATGATBGTGGT                          | This study                            |
| HVR1Bf<br>HVR1Cr           | ACCACVATCATYGATATWGGAG<br>GACTTGATGGTATTYTTTCATGG                         | This study                            |
| HVR1Cf<br>HVR1Dr           | CCATGAARGGTACCATCAAGTC<br>GARGATGGTGTGGCWGGATGTG                          | This study                            |
| HVR1Df<br>HVR1Er           | CACATCCWGCCACACCATCYTC<br>GGGCATATGGACTTRGCTTAGG                          | This study                            |
| HVR1Ef<br>HVR1Fr           | CCTAAGCYAAGTCCATATGCCC<br>GCATCTCCTTBGGAGGCATCTAA                         | This study                            |
| RNA2                       |                                                                           |                                       |
| HVR2Bf<br>HVR2Br           | GGTCTAGTCRGTTTGAATGYGA<br>TCRCATTCAAACYGACTAGACC                          | This study                            |
| HVR2Cf<br>HVR2Cr           | CATAAGAAGGGTATMGTGATGCA<br>TGCATCACKATACCCTTCTTATG                        | This study                            |
| HVR2Df<br>HVR2Dr<br>HVR2Er | TTCGAGCTGMAGGAGTTCACCA<br>TGGTGAACCTCCTKCAGCTCGAA<br>GCATCTCCTTYGGAGGCATC | This study                            |
| HV2R<br>HV7F               | GCTTTCCCGTACAAGTCGAGAG<br>AAGTCCATATGCCCACCTTCGCT                         | This study                            |
| RNA 3                      |                                                                           |                                       |
| HV1F<br>HV4R               | CTTTCGAGACTAATAGAATTC<br>CAAATWAGGGTATCCATCCCAC                           | This study                            |
| HV2F<br>HV6R               | CTCTCGACTTGTACGGGAAAGC<br>TTCAATAGCATTRCCAGACAT                           | This study                            |
| HV3F<br>HV7R               | GTGGGATGGATACCCTWATTTG<br>GCRAAGRTGGGCATATGGACTT                          | This study                            |
| HV5F<br>HV8R<br>HV9R       | ATGTCTGGYAATGCTATTGAA<br>CTCTCTCCMTGAGAGAGAG<br>GCATCTCCTTYGGAGGCACT      | This study                            |
| CP1<br>CP2                 | CATATGCAACATGTCTGGTAATG<br>CTCGAGGTCAATCCTCAACAACCAAG                     | This study                            |
